# Supplementary material for: Preclinical safety and immunogenicity of Streptococcus pyogenes (Strep A) peptide vaccines
Source: PubMed Central journal article supplement (PMC7794325; doi:10.1038/s41598-020-80508-6), 2021-01-08
Supplement: 41598_2020_80508_MOESM1_ESM.pdf [file 41598_2020_80508_MOESM1_ESM.pdf]

## Preclinical Safety and Immunogenicity of *Streptococcus pyogenes* (Strep A) Peptide Vaccines

Simone Reynolds<sup>#1\*</sup>, Manisha Pandey<sup>#1\*</sup>, Jessica Dooley<sup>1</sup>, Ainslie Calcutt<sup>1</sup>, Michael Batzloff<sup>1</sup>, Victoria Ozberk<sup>1</sup>, Jamie-Lee Mills<sup>1</sup>, Michael Good<sup>1\*</sup>

# These authors contributed equally to this work.

\* Corresponding authors: Simone Reynolds (simone.reynolds@griffith.edu.au); Manisha Pandey (m.pandey@griffith.edu.au); Michael Good (Michael.good@griffith.edu.au).

<sup>1</sup>Institute for Glycomics, Griffith University, Gold Coast, Australia.

### Supplementary Information

Supplementary Table S1. Organs and tissues for histopathological examination.

Supplementary Table S2. Injection Site Histopathology.

Supplementary Table S3. Inguinal Lymph Node Histopathology.

Supplementary Table S4. Adrenal Gland Histopathology

| <b>Supplementary Table S1. Organs and tissues for histopathological examination</b> |                          |                                                        |
|-------------------------------------------------------------------------------------|--------------------------|--------------------------------------------------------|
| Adrenal Gland (2)                                                                   | Rectum                   | Lung with large bronchi                                |
| Bone, femur (with articular surface of distal end)                                  | Seminal vesicle          | Lymph nodes (mandibular) (2)                           |
| Brain                                                                               | Skin/subcutis            | Mammary gland (females only)                           |
| Cervix uteri                                                                        | Spleen                   | Optic nerve (2)                                        |
| Duodenum                                                                            | Testes                   | Oviduct                                                |
| Esophagus                                                                           | Thyroid with parathyroid | Parathyroid gland                                      |
| Gross lesions                                                                       | Trachea                  | Pituitary gland                                        |
| Heart                                                                               | Uterus                   | Prostate (males only)                                  |
| Injection sites (Quadriceps femoris)                                                | Aorta                    | Salivary gland (mandibular) (2))                       |
| Jejunum                                                                             | Bone marrow (sternum)    | Sciatic nerve                                          |
| Liver                                                                               | Caecum                   | Spinal cord (cervical, thoracic and lumbar)            |
| Lymph nodes (inguinal) (2)                                                          | Colon                    | Stomach                                                |
| Lymph nodes (mesenteric)                                                            | Epididymis (2)           | Thymus                                                 |
| Muscle (gastrocnemius)                                                              | Eye (2)                  | Tongue                                                 |
| Ovaries                                                                             | Harderian gland (2)      | Urinary bladder                                        |
| Pancreas                                                                            | Ileum                    | Vagina                                                 |
| Peyer's patch                                                                       | Kidney (2)               | Any tissue showing abnormal presentation upon necropsy |
| Physical identifier                                                                 |                          |                                                        |

**Supplementary Table S2. Injection Site Histopathology****Injection Site, right. Inflammation, granulomatous**

| <b>Day 57</b> | <b>Males (5 per group)</b> |         |           | <b>Females (5 per group)</b> |         |           |
|---------------|----------------------------|---------|-----------|------------------------------|---------|-----------|
|               | CRM                        | J8-K4S2 | p*17-K4S2 | CRM                          | J8-K4S2 | p*17-K4S2 |
| Minimal       | 1                          | 0       | 1         | 0                            | 0       | 0         |
| Mild          | 4                          | 3       | 4         | 2                            | 1       | 2         |
| Moderate      | 0                          | 1       | 0         | 3                            | 4       | 2         |
| Marked        | 0                          | 0       | 0         | 0                            | 0       | 1         |

**Injection Site, right. Inflammation, granulomatous**

| <b>Day 86</b> | <b>Males (5 per group)</b> |         |           | <b>Females (5 per group)</b> |         |           |
|---------------|----------------------------|---------|-----------|------------------------------|---------|-----------|
|               | CRM                        | J8-K4S2 | p*17-K4S2 | CRM                          | J8-K4S2 | p*17-K4S2 |
| Minimal       | 0                          | 0       | 0         | 0                            | 0       | 0         |
| Mild          | 5                          | 5       | 2         | 5                            | 1       | 4         |
| Moderate      | 0                          | 0       | 3         | 0                            | 3       | 0         |
| Marked        | 0                          | 0       | 0         | 0                            | 0       | 1         |

**Injection Site, left. Inflammation, granulomatous**

| <b>Day 57</b> | <b>Males (5 per group)</b> |         |           | <b>Females (5 per group)</b> |         |           |
|---------------|----------------------------|---------|-----------|------------------------------|---------|-----------|
|               | CRM                        | J8-K4S2 | p*17-K4S2 | CRM                          | J8-K4S2 | p*17-K4S2 |
| Minimal       | 1                          | 0       | 0         | 2                            | 0       | 1         |
| Mild          | 3                          | 1       | 2         | 2                            | 5       | 2         |
| Moderate      | 1                          | 3       | 3         | 1                            | 0       | 2         |
| Marked        | 0                          | 0       | 0         | 0                            | 0       | 0         |

**Injection Site, left. Inflammation, granulomatous**

| <b>Day 86</b> | <b>Males (5 per group)</b> |         |           | <b>Females (5 per group)</b> |         |           |
|---------------|----------------------------|---------|-----------|------------------------------|---------|-----------|
|               | CRM                        | J8-K4S2 | p*17-K4S2 | CRM                          | J8-K4S2 | p*17-K4S2 |
|               | No evidence                |         |           | No evidence                  |         |           |

Numbers in table represent the number of animals with the finding.

CRM: CRM/Alum; J8-K4S2: J8-CRM+K4S2-CRM/Alum; p\*17-K4S2; p\*17-CRM+K4S2-CRM/Alum

| <b>Supplementary Table S3. Inguinal Lymph Node Histopathology</b> |              |          |           |                |          |           |
|-------------------------------------------------------------------|--------------|----------|-----------|----------------|----------|-----------|
| <b>Inguinal lymph node, right. Inflammation, granulomatous</b>    |              |          |           |                |          |           |
| <b>Day 57</b>                                                     | <b>Males</b> |          |           | <b>Females</b> |          |           |
|                                                                   | CRM          | J8-K4S2  | p*17-K4S2 | CRM            | J8-K4S2  | p*17-K4S2 |
| <b>(No. examined)</b>                                             | <b>2</b>     | <b>3</b> | <b>4</b>  | <b>4</b>       | <b>5</b> | <b>4</b>  |
| Minimal                                                           | 0            | 0        | 0         | 1              | 0        | 0         |
| Mild                                                              | 0            | 1        | 2         | 1              | 1        | 2         |
| Moderate                                                          | 2            | 0        | 2         | 2              | 0        | 2         |
| Marked                                                            | 0            | 1        | 0         | 0              | 2        | 0         |
| <b>Inguinal lymph node, right. Inflammation, granulomatous</b>    |              |          |           |                |          |           |
| <b>Day 86</b>                                                     | <b>Males</b> |          |           | <b>Females</b> |          |           |
|                                                                   | CRM          | J8-K4S2  | p*17-K4S2 | CRM            | J8-K4S2  | p*17-K4S2 |
|                                                                   | No evidence  |          |           | No evidence    |          |           |
| <b>Inguinal lymph node, left. Inflammation, granulomatous</b>     |              |          |           |                |          |           |
| <b>Day 57</b>                                                     | <b>Males</b> |          |           | <b>Females</b> |          |           |
|                                                                   | CRM          | J8-K4S2  | p*17-K4S2 | CRM            | J8-K4S2  | p*17-K4S2 |
| <b>(No. examined)</b>                                             | <b>4</b>     | <b>5</b> | <b>5</b>  | <b>5</b>       | <b>5</b> | <b>4</b>  |
| Minimal                                                           | 0            | 0        | 0         | 1              | 0        | 0         |
| Mild                                                              | 0            | 2        | 2         | 0              | 0        | 2         |
| Moderate                                                          | 3            | 2        | 3         | 2              | 2        | 1         |
| Marked                                                            | 1            | 0        | 0         | 1              | 2        | 1         |
| <b>Inguinal lymph node, left. Inflammation, granulomatous</b>     |              |          |           |                |          |           |
| <b>Day 86</b>                                                     | <b>Males</b> |          |           | <b>Females</b> |          |           |
|                                                                   | CRM          | J8-K4S2  | p*17-K4S2 | CRM            | J8-K4S2  | p*17-K4S2 |
| <b>(No. examined)</b>                                             | <b>4</b>     | <b>5</b> | <b>5</b>  | <b>5</b>       | <b>5</b> | <b>5</b>  |
| Mild                                                              | 1            | 2        | 1         | 1              | 1        | 1         |
| Moderate                                                          | 1            | 1        | 2         | 3              | 2        | 1         |
| Marked                                                            | 0            | 0        | 0         | 0              | 1        | 2         |

Numbers in table represent the number of animals with the finding.  
CRM: CRM/Alum; J8-K4S2: J8-CRM+K4S2-CRM/Alum; p\*17-K4S2; p\*17-CRM+K4S2-CRM/Alum

| <b>Supplementary Table S4. Adrenal Gland Histopathology</b> |                            |         |           |
|-------------------------------------------------------------|----------------------------|---------|-----------|
| <b>Adrenal Gland. Hypertrophy, cortical</b>                 |                            |         |           |
| <b>Day 57</b>                                               | <b>Males (5 per group)</b> |         |           |
|                                                             | CRM                        | J8-K4S2 | p*17-K4S2 |
| Minimal                                                     | 0                          | 1       | 2         |
| Mild                                                        | 0                          | 2       | 1         |

Numbers in table represent the number of animals with the finding.  
CRM: CRM/Alum; J8-K4S2: J8-CRM+K4S2-CRM/Alum;  
p\*17-K4S2; p\*17-CRM+K4S2-CRM/Alum
